# Supplementary material for: Influence of Mixed Valence on the Formation of Oxygen Vacancy in Cerium Oxides
Source: Materials (Basel). 2019 Dec 5;12(24):4041. doi: 10.3390/ma12244041 (PMC6947290; doi:10.3390/ma12244041)
Supplement: Supplementary file 1 [file materials-12-04041-s001.docx]

Article

Influence of Mixed Valence on the Formation of Oxygen Vacancy in Cerium Oxides

Gege Zhou 1, 2, Wentong Geng 2, Lu Sun 1, Xue Wang 1, Wei Xiao 1, Jianwei Wang 1 and Ligen Wang 1,*

1 Materials Computation Center, GRIMAT Engineering Institute Co. Ltd., General Research Institute for Nonferrous Metals, Beijing 100088, China; zgg8997@126.com (G.Z.);[sunlu@grinm.com](mailto:sunlu@grinm.com) (L.S.); [wangxue@grinm.com](javascript:void(0);) (X.W.); [xiaowei@grinm.com](mailto:xiaowei@grinm.com) (W.X.); [wangjianwei@grinm.com](javascript:void(0);) (J.W.); [lg_wang1@yahoo.com](javascript:void(0);) (L.W.)

2 School of Materials Science and Engineering, University of Science and Technology Beijing, Beijing 100083, China; [geng@mater.ustb.edu.cn](javascript:void(0);)

***** Correspondence: lg_wang1@yahoo.com; Tel.:+86–10–6066–2753

Received: 6 November 2019; Accepted: 25 November 2019; Published: date

The structural input files

**Table S1.** POSCAR for CeO2 (Figure 1a).

| **CeO2** |  |  |
| --- | --- | --- |
| 1.0 |  |  |
| 5.4809997749 | 0.0000000000 | 0.0000000000 |
| 0.0000000000 | 5.4809997749 | 0.0000000000 |
| 0.0000000000 | 0.0000000000 | 5.4809997749 |
| O | Ce |  |
| 8 | 4 |  |
| Direct |  |  |
| 0.250000000 | 0.250000000 | 0.250000000 |
| 0.750000000 | 0.750000000 | 0.250000000 |
| 0.750000000 | 0.250000000 | 0.750000000 |
| 0.250000000 | 0.750000000 | 0.750000000 |
| 0.250000000 | 0.250000000 | 0.750000000 |
| 0.750000000 | 0.750000000 | 0.750000000 |
| 0.750000000 | 0.250000000 | 0.250000000 |
| 0.250000000 | 0.750000000 | 0.250000000 |
| 0.000000000 | 0.000000000 | 0.000000000 |
| 0.000000000 | 0.500000000 | 0.500000000 |
| 0.500000000 | 0.000000000 | 0.500000000 |
| 0.500000000 | 0.500000000 | 0.000000000 |

**Table S2.** POSCAR for Ce2O3 (Figure 1b).

| **Ce2O3** |  |  |
| --- | --- | --- |
| 1.0 |  |  |
| 3.8900001049 | 0.0000000000 | 0.0000000000 |
| −1.9450000525 | 3.3688389116 | 0.0000000000 |
| 0.0000000000 | 0.0000000000 | 6.1799998283 |
| O | Ce |  |
| 3 | 2 |  |
| Direct |  |  |
| 0.000000000 | 0.000000000 | 0.000000000 |
| 0.333333356 | 0.666666713 | 0.647000027 |
| 0.666666630 | 0.333333321 | 0.352999973 |
| 0.333333356 | 0.666666713 | 0.246700005 |
| 0.666666630 | 0.333333321 | 0.753300033 |

**Table S3.** POSCAR for CeO2 -Ce2O3 (Figure 1c).

| **CeO2-Ce2O3** |  |  |
| --- | --- | --- |
| 1.0 |  |  |
| 3.8261500000 | 0.0000000000 | 0.0000000000 |
| −1.9130750000 | 3.3135430500 | 0.0000000000 |
| 0.0000000000 | 0.0000000000 | 15.546132000 |
| O | Ce |  |
| 9 | 5 |  |
| Direct |  |  |
| 0.333340000 | 0.666660000 | 0.050072000 |
| 0.000000000 | 0.000000000 | 0.150197300 |
| 0.666660000 | 0.333340000 | 0.250320000 |
| 0.333340000 | 0.666660000 | 0.350460000 |
| 0.000000000 | 0.000000000 | 0.496000000 |
| 0.666660000 | 0.333340000 | 0.649540000 |
| 0.333340000 | 0.666660000 | 0.749680000 |
| 0.000000000 | 0.000000000 | 0.849802700 |
| 0.666660000 | 0.333340000 | 0.949928000 |
| 0.000000000 | 0.000000000 | 0.000000000 |
| 0.333340000 | 0.666660000 | 0.200260000 |
| 0.666660000 | 0.333340000 | 0.400465000 |
| 0.333340000 | 0.666660000 | 0.591790000 |
| 0.666660000 | 0.333340000 | 0.792038000 |
